# Supplementary material for: Effect of delaying treatment of first-episode psychosis on symptoms and social outcomes: a longitudinal analysis and modelling study
Source: PubMed Central journal article supplement — Lancet Psychiatry. 2020 Jul;7(7):602–10. doi: 10.1016/S2215-0366(20)30147-4 (PMC7606908; doi:10.1016/s2215-0366(20)30147-4), 2020-07
Supplement: mmc1.pdf [file mmc1.pdf]

# THE LANCET Psychiatry

## Supplementary appendix

This appendix formed part of the original submission and has been peer reviewed. We post it as supplied by the authors.

Supplement to: Drake RJ, Husain N, Marshall M, et al. Effect of delaying treatment of first-episode psychosis on symptoms and social outcomes: a longitudinal analysis and modelling study. *Lancet Psychiatry* 2020; **7**: 602–10.

## Contents

|                                                                                                                                                                                                           |    |
|-----------------------------------------------------------------------------------------------------------------------------------------------------------------------------------------------------------|----|
| Supplementary methods .....                                                                                                                                                                               | 2  |
| Definition of DUP .....                                                                                                                                                                                   | 2  |
| Establishing and Maintaining reliability .....                                                                                                                                                            | 2  |
| Factor Analysis and Subscales.....                                                                                                                                                                        | 2  |
| Growth Curve Modelling.....                                                                                                                                                                               | 3  |
| Figure S1: Latent growth model for PANSS, with intercept, slope and exogenous variables including dummy EIS 2-14 for centres. ....                                                                        | 3  |
| Sensitivity Analyses .....                                                                                                                                                                                | 3  |
| Parallel Growth Process Models.....                                                                                                                                                                       | 4  |
| Modelling SOFAS scores .....                                                                                                                                                                              | 4  |
| Supplementary results.....                                                                                                                                                                                | 5  |
| Table S1. Demographic Characteristics of NEDEN sample.....                                                                                                                                                | 5  |
| Table S2. Demographic Characteristics of Outlook participants.....                                                                                                                                        | 6  |
| Table S3a. Principal axis factor loadings (>0.3) for PANSS, CDSS, MRS items and IS at baseline.....                                                                                                       | 7  |
| Table S3b. Principal axis factor loadings for PANSS, CDSS, MRS items and IS at 6 months.....                                                                                                              | 8  |
| Table S3c. Principal axis factor loadings for PANSS, CDSS, MRS items and IS at 12 months.....                                                                                                             | 9  |
| Table S3d. Variance, KMO and SMCs for obliquely rotated principal axis factors at each stage of follow-up .....                                                                                           | 10 |
| Table S3e. Items for each symptom subscale created from factor analysis results, identifying parent scales (PANSS, YMRS, CDSS, Insight Scale). ....                                                       | 10 |
| Table S4a. Pearson correlations of DUP and log10DUP with symptom subscales at baseline and subscale change scores over 6 months (6 month score – baseline score), for those assessed early .....          | 11 |
| Table S4b. Partial correlations between natural logarithm of subscale scores at baseline for those assessed early .....                                                                                   | 11 |
| Table S4c. Partial correlations for subscale change scores over 6 months for those assessed early.....                                                                                                    | 11 |
| Table S5a. Parallel growth process model of depression (D), psychosis (P) and insight (I) in the NEDEN dataset, adjusted for centre, sex, age, ethnicity, education, living alone, and drug use. ....     | 12 |
| Table S5b. Parallel growth process model of depression (D), psychosis (P) and negative symptoms (N) in NEDEN adjusted for centre, sex, age, ethnicity, education, living alone, and drug use.....         | 12 |
| Table S5c. Parallel growth process model of hostility (H), psychosis (P) and excitement/mania (M) in the NEDEN data adjusted for centre, sex, age, ethnicity, education, living alone, and drug use. .... | 12 |
| Table S6a. Predictors of baseline SOFAS score in NEDEN, adjusted for centre (predictors p<0.20) .....                                                                                                     | 13 |
| Table S6b. Predictors of final SOFAS score in NEDEN, adjusted for centre (adjusted R <sup>2</sup> 56%; predictors p<0.20) .....                                                                           | 13 |
| Table S6c. Predictors of baseline SOFAS in Outlook, adjusted for EIS (predictors p<0.20).....                                                                                                             | 13 |
| Table S6d. Predictors of final SOFAS in Outlook, adjusted for EIS (adjusted R <sup>2</sup> 54%; predictors p<0.20) ..                                                                                     | 13 |
| References .....                                                                                                                                                                                          | 14 |

## Supplementary methods

### Definition of DUP

Onset of psychosis was defined using recognised methods,<sup>1</sup> as either one PANSS positive subscale item  $\geq 4$ ; or a cluster of symptoms including either delusions, conceptual disorganisation or hallucinations with a total score of 7 or more (excluding 'absent' scorings). Symptoms had to be present for at least two weeks unless remission was due to treatment. When participants acknowledged a targeted psychotic symptom, they were asked to track back to when it began. We cross-referenced this information with pathways to care data collected from secondary and primary care records and a carer (where available). We also documented any mental health service contact prior to the formal onset of psychosis.<sup>2</sup> The end of the period of untreated psychosis was defined as the onset of criterion treatment with antipsychotic medication, defined as antipsychotic treatment with regular adherence either: prescribed for at least one month at dosage recommended by the British National Formulary<sup>3</sup> (e.g. 2 mg risperidone); or leading to a significant reduction in symptoms as measured by PANSS.

### Establishing and Maintaining reliability

Raters trained in the PANSS and DUP methodology at central workshops delivered six times during the study. Interviewers were required to achieve  $\kappa$  or intra-class correlation  $\rho > 0.75$  with trainers on standard exemplars. At every 20<sup>th</sup> PANSS assessment research assistants were accompanied by experienced PANSS raters who checked concordance. PANSS interviews were cross-rated between sites to prevent drift between sites and within sites. Every 12 months five DUP interviews and supporting calculations from all sites were independently checked for concordance.

### Alternative linear regression models of 6 month PANSS

The DUP-derived variables used to test the alternative models listed were:

- DUP dichotomised: DUP  $\leq 4$  weeks scored 0, DUP  $> 4$  weeks as 1.
- DUP dichotomised into  $\leq 26$  weeks or  $> 26$  weeks
- DUP scored continuously in weeks, except DUP  $\leq 4$  weeks recorded as 0
- Continuously scored DUP in weeks
- $\sqrt{\text{DUP}}$
- $\text{Log}_{10}(\text{DUP})$

They represented:

- A distinction between DUP matching criteria for affective psychosis and brief psychosis only, and DUP  $> 4$  weeks consistent with schizophreniform, schizoaffective, and delusional disorders and schizophrenia (ICD)
- A distinction between DUP matching criteria for DSM schizophrenia and all other disorders
- A model of minimal harm from brief psychoses and steadily accumulating damage due to the others
- A model of linear increase in effect of delay, i.e. the same harm from prolonging a DUP of 1 week by another week, as from prolonging a DUP of 208 weeks by another week.
- A model of accumulating harm but decreasing extra damage as delay progresses; or staggered early and swift transitions in harm
- A more radical model of deceleration.

Models based on diagnostic criteria imply either a meaningful difference in the effect of DUP between diagnoses (e.g. c) or potentially the effect of DUP being fully explained by diagnostic confounding, i.e. due to differences in prognosis of different diagnoses with different DUP criteria (e.g. a and b).

### Factor Analysis and Subscales

Principal axis factoring was performed with *Stata 14.1*<sup>4</sup> on the NEDEN PANSS, MRS and CDSS items and IS total at each successive stage. Items were dropped if SMC was  $< 0.35$  or uniqueness  $> 0.75$  and the factoring and exclusion process repeated until the result was stable. After *promax* rotation each stage produced 6 factors with consistent item loadings (supplementary table S3a-c). Anti-image matrices, MSAs and KMO scores all indicated well-fitting models for each stage (Table S3d), each with 6 factors above eigenvalue 1.0.<sup>5</sup>

Items loading  $> 0.30$  onto these factors were totalled to form subscales representing each dimension (Table S3e). Item scores were rescaled so that each had equal weight and the item score total was averaged (i.e. scores for YMRS and CDSS and IS totals were rescaled to range 1-7 and the mean score for all subscale items for that individual and follow-up point calculated), to generate a score of 1-7 for each subscale, similar to the parent PANSS items and therefore intuitively understandable. Subscale totals were calculated in the same way using the same items in the Outlook dataset, there being too few cases (especially at follow-up) to allow independent principal axis factoring.

### Growth Curve Modelling

Growth curve models<sup>6</sup> (GCMs; Figure S1) were formulated for PANSS total score and each of the subscales with Stata's *gsem* command, i.e. using Generalised Structural Equation Modelling (GSEM). GSEM estimates using quasi-maximum likelihood and deletes cases with a missing datum from specific equations rather than the whole analysis, generating fewer missing cases. It also estimates conditioned on exogenous measures, rather than modelling them assuming joint normality like classical Structural Equation Modelling (SEM).<sup>6,7</sup> GCMs of this type are robust to data missing-at-random.<sup>8</sup>

Throughout the modelling process, to test prediction 4 (*delay reversal*), the sample was divided *a priori* into those first assessed within 3 weeks of presentation to services (the early group) and those first assessed later on (the late group) after the greatest reduction in symptoms with treatment had occurred. Each model consisted of two covarying latent variables: one modelling the intercept, fixed at  $\lambda=1$  for each time point; and another the slope of symptom scores over follow-up, fixed at  $\lambda=1$  for 6 months, freely varying for 12 months. To allow identification, residual variance of manifest symptom scores was constrained to be equal at each visit.<sup>6</sup> Examining predicted and residual values for GCMs revealed that departure from normality for the subscale totals (but not PANSS total) challenged the *idd* assumption, so subscale scores were transformed using the natural logarithm of each one (conveniently, each was already scaled with a minimum score of 1).

Contrasts between "early" and "late" models were calculated using Stata's *contrast* command in relation to the interaction term. Hedge's *g* was calculated by hand using the mean 6 month PANSS change values modelled in main text Fig. 1 (based on equations created from GSEM), and the values for *n* and PANSS SDs for the NEDEN early and late groups at baseline and first follow-up.

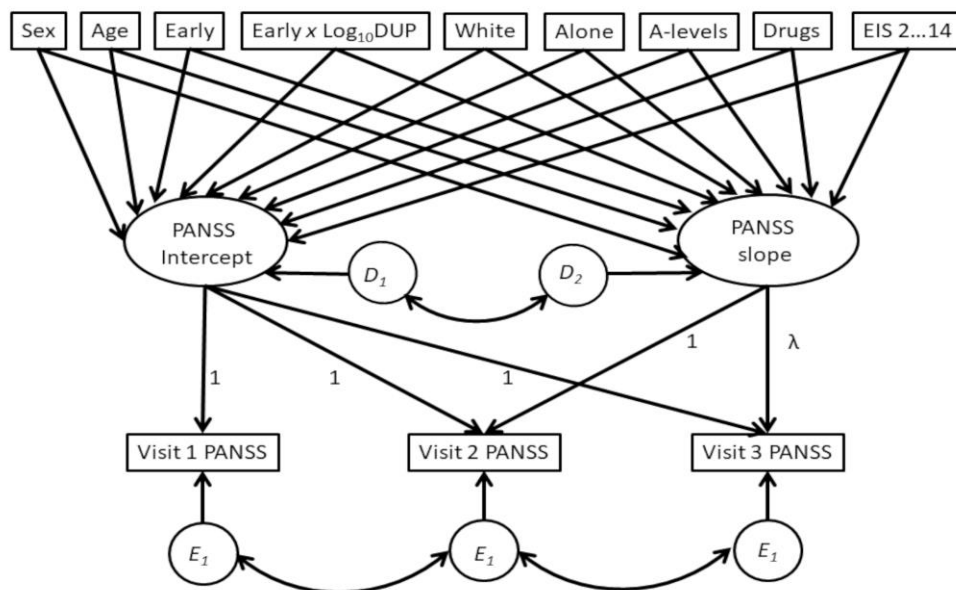

**Figure S1: Latent growth model for PANSS, with intercept, slope and exogenous variables including dummy EIS 2-14 for centres.**

E1 indicates error terms are fixed to be identical at each visit, D1,2 are disturbance terms and loading  $\lambda$  is free.

### Sensitivity Analyses

Apart from examining the effect of including prodrome duration in each growth curve model, for PANSS total and each subscale alternative specifications were compared to the main models using  $\chi^2$  and AIC, i.e.:

- i) GCMs with two latent variables were compared to single latent variable models;
- ii) two latent variable models in which the second latent variable was constrained to model linear change; or
- iii) loading for latent six and 12 month scores equal to each other.
- iv) Models combining clustering within centres and main effects of centre were compared to multi-level versions.

### **Parallel Growth Process Models**

For the parallel growth process models,<sup>9</sup> as subscales' relationships would likely differ in those assessments completed in the first weeks compared to those done later,<sup>10</sup> so the *sem* Structural Equation Modelling command was used to allow separate maximum likelihood estimation in early and late groups, impossible with *gsem*.

For the first model latent variables were created first for Psychosis, Depression and Insight intercepts, and then to model change in Psychosis, Depression and Insight, using the same specifications as the GCMs above (i.e. values of  $\lambda$  at each point, equal variances of manifest variables). For each subscale, latent intercept and change covaried. Each intercept covaried with the other intercepts and each change variable with the other ones; but there was no cross-covariance (e.g. P with FUI). The same exogenous variables were included as in the simple GCMs. This process was repeated (see Tables S5a-c) for models of Psychosis, Depression and Negative subscales; and Psychosis, Hostility-Impulsiveness and Excitement-Mania.

### **Modelling SOFAS scores**

To model the relationship between DUP and social function in NEDEN, first simple correlations of  $\log_{10}$ DUP and SOFAS at baseline and follow-up were calculated. Then  $\log_{10}$ DUP, baseline scale scores, sex, age, ethnic group, illicit drug use, living alone, and passing A-levels were regressed against baseline SOFAS in multivariate regressions fitted using ordinary least squares separately for "early" or "late" groups. Backwards elimination removed all terms with associations of  $p > 0.20$ . The best fitting regressions (by AIC, residual and fitted plots) required clustering by centre but not bootstrapping. Results (including plots and AICs) for these models (using the *bootstrap* command, stratified by centre, to test whether the distributional assumptions for regression were better met; and unclustered models) are available on request from the corresponding author. The procedure was repeated for final SOFAS score, including baseline SOFAS as an independent variable (see Tables S6a-c). For final SOFAS, given that there was little difference between models for early and late group and no significant difference between groups in Pearson correlation coefficients between  $\log_{10}$ DUP and final SOFAS, the whole cohort was combined. The same was true when these procedures were repeated in the Outlook dataset.

## Supplementary results

**Table S1. Demographic Characteristics of NEDEN sample.**

| Variable                        | Declined to participate<br>(n=1068) | All recruits<br>(n=991)                    | 6 month follow-up <sup>1</sup><br>(n=751)  | 12 month follow-up <sup>1</sup><br>(n=719) |
|---------------------------------|-------------------------------------|--------------------------------------------|--------------------------------------------|--------------------------------------------|
|                                 | N (%)                               | N (%)                                      | N (%)                                      | N (%)                                      |
| <i>Gender:</i>                  |                                     |                                            |                                            |                                            |
| Male                            | 709 (66%)                           | 682 (69%)                                  | 520 (69%)                                  | 492 (68%)                                  |
| Female                          | 363 (35%)                           | 309 (31%)                                  | 231 (31%)                                  | 227 (32%)                                  |
| <i>Ethnicity:</i>               |                                     |                                            |                                            |                                            |
| White                           | 753 (70%)                           | 718 (73%)                                  | 530 (71%)                                  | 511 (71%)                                  |
| Asian                           | 116 (11%)                           | 154 (16%)                                  | 128 (17%)                                  | 120 (17%)                                  |
| Black                           | 47 (4%)                             | 71 (7%)                                    | 60 (8%)                                    | 51 (7%)                                    |
| Mixed or other                  | 72 (6%)                             | 48 (5%)                                    | 33 (4%)                                    | 37 (5%)                                    |
| Unknown                         | 82 (8%)                             | -                                          | -                                          | -                                          |
| <i>Marital status:</i>          |                                     |                                            |                                            |                                            |
| Married or cohabiting           | 97 (9%)                             | 123 (12%)                                  | 95 (13%)                                   | 90 (13%)                                   |
| Single                          | 849 (79%)                           | 839 (85%)                                  | 634 (84%)                                  | 608 (85%)                                  |
| Separated or divorced           | 21 (2%)                             | 29 (3%)                                    | 22 (3%)                                    | 21 (3%)                                    |
| Unknown                         | 114 (11%)                           | -                                          | -                                          | -                                          |
| <i>Diagnosis:</i>               |                                     |                                            |                                            |                                            |
| Schizophrenia                   |                                     | 246 (25%)                                  | 179 (24%)                                  | 188 (26%)                                  |
| Unspecified psychosis           |                                     | 413 (42%)                                  | 312 (42%)                                  | 293 (41%)                                  |
| Schizophreniform disorder       |                                     | 45 (5%)                                    | 35 (5%)                                    | 35 (5%)                                    |
| Delusional disorder             |                                     | 48 (5%)                                    | 39 (5%)                                    | 36 (5%)                                    |
| Major depression (psychotic)    |                                     | 77 (8%)                                    | 61 (8%)                                    | 56 (8%)                                    |
| Bipolar disorder                |                                     | 63 (6%)                                    | 50 (7%)                                    | 40 (6%)                                    |
| Schizoaffective disorder        |                                     | 63 (6%)                                    | 53 (7%)                                    | 51 (7%)                                    |
| Drug induced psychosis          |                                     | 20 (2%)                                    | 10 (1%)                                    | 13 (2%)                                    |
| Unknown <sup>2</sup>            |                                     | 16 (2%)                                    | 12 (2%)                                    | 7 (1%)                                     |
| <i>Living situation:</i>        |                                     |                                            |                                            |                                            |
| Alone                           |                                     | 126 (13%)                                  | 92 (12%)                                   | 95 (13%)                                   |
| With partner                    |                                     | 104 (11%)                                  | 489 (65%)                                  | 73 (10%)                                   |
| With parents or guardian        |                                     | 627 (63%)                                  | 78 (10%)                                   | 461 (64%)                                  |
| Other or unknown                |                                     | 134 (14%)                                  | 92 (12%)                                   | 90 (13%)                                   |
| Education to A-levels or higher |                                     | 344 (35%)                                  | 275 (37%)                                  | 247 (34%)                                  |
| In paid work                    |                                     | 185 (19%)                                  | 139 (19%)                                  | 133 (19%)                                  |
|                                 |                                     | <b>Mean (SD)<sup>3</sup></b>               | <b>Mean (SD)<sup>3</sup></b>               | <b>Mean (SD)<sup>3</sup></b>               |
| Age at onset of psychosis       |                                     | 21.4 (5.0)                                 | 21.7 (5.0)                                 | 21.6 (5.1)                                 |
| PANSS total score               |                                     | 63.0 (19.0)                                | 51.0 (15.0)                                | 49.3 (15.8)                                |
| CDSS total                      |                                     | 6.3 (5.4)                                  | 4.15 (4.6)                                 | 3.55 (4.4)                                 |
| MRS total                       |                                     | 5.8 (7.2)                                  | 3.31 (5.0)                                 | 3.27 (5.2)                                 |
| IS total                        |                                     | 7.7 (3.0)                                  |                                            | 8.75 (2.8)                                 |
| SOFAS                           |                                     | 52.7 (15.3)                                |                                            | 62.9 (17.3)                                |
|                                 |                                     | <b>Geometric mean<br/>(CI)<sup>4</sup></b> | <b>Geometric mean<br/>(CI)<sup>4</sup></b> | <b>Geometric mean<br/>(CI)<sup>4</sup></b> |
| Prodrome in days (n=956)        |                                     | 152 (132 to 175)                           | 148 (127 to 174)                           | 151 (128 to 177)                           |
| DUP in days                     |                                     | 69 (61 to 79)                              | 59 (51 to 69)                              | 55 (47 to 64)                              |

1. Follow-up defined as PANSS score recorded

2. Unknown diagnosis refers to 14 participants with insufficient data to run the OPCRIT programme and 2 patients with diagnosis not allocated by OPCRIT

3. SD: Standard deviation

4. CI: 95% Confidence Interval

**Table S2. Demographic Characteristics of Outlook participants.**

| <b>Variable</b>                 | <b>Whole group (n=332)<br/>N (%)</b>   | <b>6 month follow-up<sup>1</sup> (n=238)<br/>N (%)</b> | <b>12 month follow-up<sup>1</sup> (n=220)<br/>N (%)</b> |
|---------------------------------|----------------------------------------|--------------------------------------------------------|---------------------------------------------------------|
| <i>Gender:</i>                  |                                        |                                                        |                                                         |
| Male                            | 246 (62%)                              | 145 (61%)                                              | 135 (61%)                                               |
| Female                          | 153 (38%)                              | 93 (39%)                                               | 85 (39%)                                                |
| <i>Ethnicity:</i>               |                                        |                                                        |                                                         |
| White                           | 268 (67%)                              | 185 (78%)                                              | 167 (76%)                                               |
| Asian                           | 20 (5%)                                | 9 (4%)                                                 | 10 (5%)                                                 |
| Black                           | 70 (18%)                               | 27 (11%)                                               | 28 (13%)                                                |
| Mixed or other                  | 41 (10%)                               | 17 (7%)                                                | 15 (7%)                                                 |
| <i>Marital status:</i>          |                                        |                                                        |                                                         |
| Single                          | 320 (80%)                              | 193 (81%)                                              | 178 (81%)                                               |
| <i>Diagnosis:</i>               |                                        |                                                        |                                                         |
| Schizophrenia                   | 124 (35%)                              | 64 (29%)                                               | 59 (29%)                                                |
| Unspecified psychosis           | 83 (23%)                               | 56 (26%)                                               | 55 (27%)                                                |
| Schizophreniform disorder       | 28 (8%)                                | 10 (5%)                                                | 10 (5%)                                                 |
| Delusional disorder             | 19 (5%)                                | 14 (6%)                                                | 13 (6%)                                                 |
| Major depression (psychotic)    | 17 (6%)                                | 14 (6%)                                                | 11 (5%)                                                 |
| Bipolar disorder                | 44 (12%)                               | 32 (15%)                                               | 30 (14%)                                                |
| Schizoaffective disorder        | 24 (8%)                                | 18 (8%)                                                | 18 (9%)                                                 |
| Drug induced psychosis          | 23 (6%)                                | 19 (9%)                                                | 5 (3%)                                                  |
| Unknown <sup>2</sup>            | 44 (5%)                                | 20 (10%)                                               | 16 (7%)                                                 |
| Education to A levels or higher | 152 (40%)                              | 99 (42%)                                               | 92 (42%)                                                |
| In paid work                    | 74 (19%)                               | 48 (20%)                                               | 41 (19%)                                                |
|                                 | <b>Mean (SD)<sup>3</sup></b>           | <b>Mean (SD)<sup>3</sup></b>                           | <b>Mean (SD)<sup>3</sup></b>                            |
| Age at onset of psychosis       | 25.1 (8.1)                             | 24.7 (8.3)                                             | 24.3 (7.9)                                              |
| PANSS total score               | 63 (16)                                | 52 (15)                                                | 50 (15)                                                 |
| CDSS total                      | 5.3 (4.9)                              | 3.8 (4.4)                                              | 3.7 (4.3)                                               |
| MRS total                       | 7.4 (6.8)                              | 3.9 (4.9)                                              | 3.8 (5.1)                                               |
| IS total                        | 7.6 (3.1)                              |                                                        | 8.5 (2.5)                                               |
| SOFAS                           | 47 (15)                                |                                                        | 60 (17)                                                 |
|                                 | <b>Geometric mean (CI)<sup>4</sup></b> | <b>Geometric mean (CI)<sup>4</sup></b>                 | <b>Geometric mean (CI)<sup>4</sup></b>                  |
| DUP, days                       | 63 (53 to 75)                          | 65 (51 to 82)                                          | 76 (59 to 98)                                           |

1. Follow-up defined as PANSS score recorded

2. Unknown diagnosis

3. SD: Standard deviation

4. CI: 95% Confidence Interval

**Table S3a. Principal axis factor loadings (>0.3) for PANSS, CDSS, MRS items and IS at baseline**

| Scale                   | Item                       | Depression | Psychosis | Negative | Excitement | Hostility | Poor insight |
|-------------------------|----------------------------|------------|-----------|----------|------------|-----------|--------------|
| <b>PANSS</b>            | Delusions                  |            | 0.88      |          |            |           |              |
|                         | Conceptual disorganisation |            | 0.43      |          | 0.35       |           |              |
|                         | Hallucinatory behaviour    |            | 0.58      |          |            |           |              |
|                         | Excitement                 |            | 0.32      |          | 0.51       |           |              |
|                         | Grandiosity                |            | 0.50      |          |            |           |              |
|                         | Suspiciousness             |            | 0.54      |          |            |           |              |
|                         | Hostility                  |            |           |          |            | 0.75      |              |
|                         | Blunting                   |            |           | 0.79     |            |           |              |
|                         | Emotional withdrawal       |            |           | 0.69     |            |           |              |
|                         | Poor rapport               |            |           | 0.75     |            |           |              |
|                         | Passive social withdrawal  |            |           | 0.65     |            |           |              |
|                         | Lack of spontaneity        |            |           | 0.88     |            |           |              |
|                         | Anxiety                    | 0.41       | 0.35      |          |            |           |              |
|                         | Guilt                      | 0.47       |           |          |            |           |              |
|                         | Tension                    |            |           | 0.30     |            |           |              |
|                         | Depression                 | 0.64       |           |          |            |           |              |
|                         | Motor retardation          |            |           | 0.75     |            |           |              |
|                         | Uncooperativeness          |            |           |          |            | 0.57      |              |
|                         | Unusual thought content    |            | 0.84      |          |            |           |              |
|                         | Poor attention             |            |           | 0.37     | 0.33       |           |              |
| Lack of insight         |                            |            |           |          |            | 0.63      |              |
| Disturbed volition      |                            |            | 0.53      |          |            |           |              |
| Poor impulse control    |                            |            |           |          | 0.52       |           |              |
| Preoccupation (autism)  |                            | 0.36       |           |          |            |           |              |
| Active social avoidance |                            | 0.30       | 0.30      |          |            |           |              |
| <b>MRS</b>              | Elevated mood              |            |           |          | 0.74       |           |              |
|                         | Increased activity         |            |           |          | 0.83       |           |              |
|                         | Sleep                      | 0.41       |           |          | 0.30       |           |              |
|                         | Irritability               |            |           |          | 0.44       | 0.39      |              |
|                         | Speech amount              |            |           |          | 0.75       |           |              |
|                         | Thought disorder           |            |           |          | 0.68       |           |              |
|                         | Speech content             |            | 0.40      |          |            |           |              |
|                         | Aggression                 |            |           |          | 0.44       | 0.43      |              |
| Insight                 |                            |            |           |          |            | 0.74      |              |
| <b>IS</b>               | Total insight              |            |           |          |            |           | -0.68        |
| <b>CDSS</b>             | Depression (mood)          | 0.79       |           |          |            |           |              |
|                         | Hopelessness               | 0.75       |           |          |            |           |              |
|                         | Self-depreciation          | 0.73       |           |          |            |           |              |
|                         | Guilty ideas of reference  | 0.59       |           |          |            |           |              |
|                         | Pathological guilt         | 0.68       |           |          |            |           |              |
|                         | Morning depression         | 0.64       |           |          |            |           |              |
|                         | Early wakening             | 0.53       |           |          |            |           |              |
|                         | Suicide                    | 0.62       |           |          |            |           |              |
| Observed depression     | 0.76                       |            |           |          |            |           |              |



**Table S3b. Principal axis factor loadings for PANSS, CDSS, MRS items and IS at 6 months**

| Scale                   | Item                       | Depression | Psychosis | Negative | Excitement | Hostility | Poor insight |
|-------------------------|----------------------------|------------|-----------|----------|------------|-----------|--------------|
| PANSS                   | Delusions                  |            | 0.88      |          |            |           |              |
|                         | Conceptual disorganisation |            | 0.36      |          |            |           | 0.30         |
|                         | Hallucinatory behaviour    |            | 0.55      |          |            |           |              |
|                         | Excitement                 |            |           |          | 0.65       |           |              |
|                         | Suspiciousness             | 0.32       | 0.51      |          |            |           |              |
|                         | Hostility                  |            |           |          |            | 0.76      |              |
|                         | Blunting                   |            |           | 0.77     |            |           |              |
|                         | Emotional withdrawal       |            |           | 0.73     |            |           |              |
|                         | Poor rapport               |            |           | 0.69     |            |           |              |
|                         | Passive social withdrawal  |            |           | 0.69     |            |           |              |
|                         | Lack of spontaneity        |            |           | 0.83     |            |           |              |
|                         | Anxiety                    | 0.50       | 0.35      |          |            |           |              |
|                         | Guilt                      | 0.70       |           |          |            |           | 0.34         |
|                         | Depression                 | 0.77       |           |          |            |           |              |
|                         | Motor retardation          |            |           | 0.57     |            |           |              |
|                         | Uncooperativeness          |            |           |          |            | 0.60      |              |
|                         | Unusual thought content    |            | 0.84      |          |            |           |              |
|                         | Poor attention             |            |           | 0.31     |            |           |              |
|                         | Lack of insight            |            |           |          |            |           | 0.49         |
|                         | Disturbed volition         |            |           | 0.43     |            |           |              |
| Poor impulse control    |                            |            |           |          | 0.63       |           |              |
| Preoccupation (autism)  |                            | 0.36       |           |          |            |           |              |
| Active social avoidance | 0.32                       | 0.30       | 0.30      |          |            |           |              |
| MRS                     | Elevated mood              |            |           |          | 0.82       |           |              |
|                         | Increased activity         |            |           |          | 0.83       |           |              |
|                         | Irritability               |            |           |          |            | 0.58      |              |
|                         | Speech amount              |            |           |          | 0.76       |           |              |
|                         | Thought disorder           |            |           |          | 0.39       |           |              |
|                         | Speech content             |            | 0.57      |          |            |           |              |
|                         | Aggression                 |            |           |          |            | 0.64      |              |
| Insight                 |                            |            |           |          |            | 0.47      |              |
| CDSS                    | Depression (mood)          | 0.80       |           |          |            |           |              |
|                         | Hopelessness               | 0.67       |           |          |            |           |              |
|                         | Self-depreciation          | 0.75       |           |          |            |           |              |
|                         | Guilty ideas of reference  | 0.50       |           |          |            |           |              |
|                         | Pathological guilt         | 0.76       |           |          |            |           | 0.39         |
|                         | Morning depression         | 0.66       |           |          |            |           |              |
|                         | Suicide                    | 0.52       |           |          |            |           |              |
| Observed depression     | 0.64                       |            |           |          |            |           |              |

**Table S3c. Principal axis factor loadings for PANSS, CDSS, MRS items and IS at 12 months**

| Scale                   | Item                       | Depression | Psychosis | Negative | Excitement | Hostility | Poor insight |
|-------------------------|----------------------------|------------|-----------|----------|------------|-----------|--------------|
| <b>PANSS</b>            | Delusions                  |            | 0.84      |          |            |           |              |
|                         | Conceptual disorganisation |            |           |          | 0.41       |           |              |
|                         | Hallucinatory behaviour    |            | 0.63      |          |            |           |              |
|                         | Excitement                 |            |           |          | 0.74       |           |              |
|                         | Grandiosity                |            | 0.50      |          |            |           |              |
|                         | Suspiciousness             |            | 0.31      |          |            | 0.33      |              |
|                         | Hostility                  |            |           |          |            | 0.78      |              |
|                         | Blunting                   |            |           | 0.83     |            |           |              |
|                         | Emotional withdrawal       | 0.30       |           | 0.65     |            |           |              |
|                         | Poor rapport               |            |           | 0.70     |            |           |              |
|                         | Passive social withdrawal  | 0.32       |           | 0.63     |            |           |              |
|                         | Lack of spontaneity        |            |           | 0.85     |            |           |              |
|                         | Stereotyped thinking       |            | 0.39      |          |            |           |              |
|                         | Anxiety                    | 0.46       |           |          |            |           |              |
|                         | Guilt                      | 0.52       |           |          |            |           |              |
|                         | Tension                    |            | 0.38      |          |            |           |              |
|                         | Stereotypies               |            |           | 0.34     |            |           |              |
|                         | Depression                 | 0.85       |           |          |            |           |              |
|                         | Motor retardation          |            |           | 0.75     |            |           |              |
|                         | Uncooperativeness          |            |           |          |            | 0.63      |              |
|                         | Unusual thought content    |            | 0.82      |          |            |           |              |
| Poor attention          |                            |            |           |          |            |           |              |
| Lack of insight         |                            |            |           |          |            | 0.71      |              |
| Disturbed volition      |                            |            | 0.46      |          |            |           |              |
| Poor impulse control    |                            |            |           |          | 0.50       |           |              |
| Preoccupation (autism)  |                            |            | 0.31      |          |            |           |              |
| Active social avoidance | 0.45                       |            |           |          |            |           |              |
| <b>MRS</b>              | Elevated mood              |            |           |          | 0.75       |           |              |
|                         | Increased activity         |            |           |          | 0.75       |           |              |
|                         | Irritability               |            |           |          |            | 0.60      |              |
|                         | Speech amount              |            |           |          | 0.71       |           |              |
|                         | Thought disorder           |            |           |          | 0.52       |           |              |
|                         | Speech content             |            | 0.49      |          |            |           |              |
|                         | Aggression                 |            |           |          |            | 0.64      |              |
| Insight                 |                            |            |           |          |            | 0.69      |              |
| <b>IS</b>               | Total insight              |            |           |          |            |           | -0.72        |
| <b>CDSS</b>             | Depression (mood)          | 0.83       |           |          |            |           |              |
|                         | Hopelessness               | 0.75       |           |          |            |           |              |
|                         | Self-depreciation          | 0.75       |           |          |            |           |              |
|                         | Guilty ideas of reference  | 0.60       |           |          |            |           |              |
|                         | Pathological guilt         | 0.71       |           |          |            |           |              |
|                         | Morning depression         | 0.79       |           |          |            |           |              |
|                         | Suicide                    | 0.54       |           |          |            |           |              |
| Observed depression     | 0.71                       |            |           |          |            |           |              |

**Table S3d. Variance, KMO and SMCs for obliquely rotated principal axis factors at each stage of follow-up**

|                     | Baseline Variance (proportion) | B/L KMO (range of SMCs) | 6 month variance (proportion) | 6 month KMO (range of SMCs) | 12 month variance (proportion) | 12 month KMO (range of SMCs) |
|---------------------|--------------------------------|-------------------------|-------------------------------|-----------------------------|--------------------------------|------------------------------|
| <b>Depression</b>   | 7.0 (29%)                      | 0.91<br>(0.38-0.69)     | 6.8 (32%)                     | 0.89<br>(0.34-0.79)         | 7.6 (32%)                      | 0.90<br>(0.33-0.79)          |
| <b>Psychosis</b>    | 6.7 (28%)                      |                         | 6.2 (29%)                     |                             | 6.7 (28%)                      |                              |
| <b>Negative</b>     | 6.2 (25%)                      |                         | 5.6 (26%)                     |                             | 6.3 (26%)                      |                              |
| <b>Excitement</b>   | 5.5 (22%)                      |                         | 5.1 (24%)                     |                             | 4.4 (19%)                      |                              |
| <b>Hostility</b>    | 3.8 (16%)                      |                         | 3.5 (17%)                     |                             | 5.5 (23%)                      |                              |
| <b>Poor insight</b> | 2.7 (11%)                      |                         | 2.2 (10%)                     |                             | 3.8 (16%)                      |                              |

**Table S3e. Items for each symptom subscale created from factor analysis results, identifying parent scales (PANSS, YMRS, CDSS, Insight Scale).**

| Factor              | PANSS items                                                                                                                                                       | YMRS items                                                                                                    | CDSS items                                                                                                                                                           | Insight Scale |
|---------------------|-------------------------------------------------------------------------------------------------------------------------------------------------------------------|---------------------------------------------------------------------------------------------------------------|----------------------------------------------------------------------------------------------------------------------------------------------------------------------|---------------|
| <b>Negative</b>     | blunting, n1<br>emotional withdrawal, n2<br>poor rapport, n3<br>social withdrawal, n4<br>poverty of speech, n6<br>motor retardation, g7<br>abnormal volition, g13 |                                                                                                               |                                                                                                                                                                      |               |
| <b>Psychosis</b>    | delusional severity, p1<br>hallucination, p3<br>suspiciousness, p6<br>stereotyped thinking, n7<br>bizarre ideation, g9                                            | content (item 8)                                                                                              |                                                                                                                                                                      |               |
| <b>Excitement</b>   | agitation, p4                                                                                                                                                     | elevated mood (item 1)<br>hyperactivity (item 2)<br>pressure of speech (item 6)<br>disordered speech (item 7) |                                                                                                                                                                      |               |
| <b>Depression</b>   | anxiety, g2<br>guilt, g3<br>depression, g6                                                                                                                        |                                                                                                               | subjective depression<br>objective depression<br>hopelessness<br>self-depreciation<br>guilty ideas of reference<br>pathological guilt<br>early waking<br>suicidality |               |
| <b>Hostility</b>    | hostility, p7<br>uncooperativeness, g8<br>impulsive aggression, g14                                                                                               | irritability (item 5)<br>aggression (item 9)                                                                  |                                                                                                                                                                      |               |
| <b>Poor insight</b> | poor judgement, g12                                                                                                                                               | insight (item 11)                                                                                             |                                                                                                                                                                      | Total score   |

**Table S4a. Pearson correlations of DUP and log10DUP with symptom subscales at baseline and subscale change scores over 6 months (6 month score – baseline score), for those assessed early**

| Baseline Subscale | DUP   | log <sub>10</sub> DUP | 6 Month Subscale Change | DUP  | log <sub>10</sub> DUP |
|-------------------|-------|-----------------------|-------------------------|------|-----------------------|
| PANSS             | -0.08 | -0.16                 | PANSS                   | 0.23 | 0.31                  |
| Negative          | -0.08 | -0.07                 | Negative                | 0.15 | 0.14                  |
| Psychosis         | 0.03  | -0.09                 | Psychosis               | 0.19 | 0.32                  |
| Poor Insight      | -0.19 | -0.23                 | Poor Insight            | 0.19 | 0.25                  |
| Depression        | 0.11  | 0.10                  | Depression              | 0.02 | 0.10                  |
| Hostility         | -0.06 | -0.15                 | Hostility               | 0.18 | 0.23                  |
| Excitement        | -0.12 | -0.35                 | Excitement              | 0.19 | 0.33                  |

**Table S4b. Partial correlations between natural logarithm of subscale scores at baseline for those assessed early**

| Baseline     | Negative     | Psychosis   | Poor Insight | Depression   | Hostility   | Excitement |
|--------------|--------------|-------------|--------------|--------------|-------------|------------|
| Negative     | 1            |             |              |              |             |            |
| Psychosis    | <b>0.16</b>  | 1           |              |              |             |            |
| Poor Insight | <b>0.13</b>  | <i>0.30</i> | 1            |              |             |            |
| Depression   | <b>0.16</b>  | <i>0.23</i> | <i>-0.22</i> | 1            |             |            |
| Hostility    | <i>0.17</i>  | <i>0.23</i> | <b>0.14</b>  | 0.10         | 1           |            |
| Excitement   | <b>-0.13</b> | <b>0.14</b> | <i>0.18</i>  | <i>-0.19</i> | <i>0.34</i> | 1          |

Partial correlations; simply in **bold** 0.05<p<0.01, in *bold & italics* p<0.01.

**Table S4c. Partial correlations for subscale change scores over 6 months for those assessed early**

| Change       | Negative    | Psychosis   | Poor Insight | Depression  | Hostility   | Excitement |
|--------------|-------------|-------------|--------------|-------------|-------------|------------|
| Negative     | 1           |             |              |             |             |            |
| Psychosis    | <b>0.32</b> | 1           |              |             |             |            |
| Poor Insight | -0.09       | <b>0.42</b> | 1            |             |             |            |
| Depression   | <b>0.26</b> | 0.13        | -0.04        | 1           |             |            |
| Hostility    | 0.17        | <b>0.19</b> | 0.15         | <b>0.21</b> | 1           |            |
| Excitement   | -0.14       | <b>0.20</b> | 0.12         | -0.10       | <b>0.19</b> | 1          |

Partial correlations in **bold**: p<0.05

**Table S5a. Parallel growth process model of depression (D), psychosis (P) and insight (I) in the NEDEN dataset, adjusted for centre, sex, age, ethnicity, education, living alone, and drug use.**

| SEM Group & latent variable type | Symptoms   | Log <sub>10</sub> DUP coefficient | 95% Confidence Interval | Standardized coefficient (β) | p                |
|----------------------------------|------------|-----------------------------------|-------------------------|------------------------------|------------------|
| Early Group Latent Intercept     | Depression | 0.043                             | -0.019, 0.105           | 0.10                         | 0.175            |
|                                  | Insight    | -0.149                            | -0.246, -0.053          | <b>-0.26</b>                 | <b>0.002</b>     |
|                                  | Psychosis  | -0.026                            | -0.119, 0.066           | -0.09                        | 0.579            |
| Early Group Latent Change        | Depression | 0.088                             | 0.044, 0.132            | <b>0.28</b>                  | <b>&lt;0.001</b> |
|                                  | Insight    | 0.141                             | 0.083, 0.199            | <b>0.41</b>                  | <b>&lt;0.001</b> |
|                                  | Psychosis  | 0.201                             | 0.135, 0.266            | <b>0.52</b>                  | <b>&lt;0.001</b> |
| Late Group Latent Intercept      | Depression | 0.004                             | -0.028, 0.035           | 0.01                         | 0.820            |
|                                  | Insight    | 0.006                             | -0.069, 0.081           | 0.01                         | 0.877            |
|                                  | Psychosis  | 0.056                             | -0.009, 0.120           | 0.14                         | 0.089            |
| Late Group Latent Change         | Depression | 0.030                             | -0.010, 0.078           | 0.20                         | 0.213            |
|                                  | Insight    | 0.032                             | -0.002, 0.067           | 0.17                         | 0.068            |
|                                  | Psychosis  | 0.026                             | -0.010, 0.061           | 0.09                         | 0.163            |

**Table S5b. Parallel growth process model of depression (D), psychosis (P) and negative symptoms (N) in NEDEN adjusted for centre, sex, age, ethnicity, education, living alone, and drug use.**

| SEM Group & latent variable type | Symptoms   | Log <sub>10</sub> DUP coefficient | 95% Confidence Intervals | Standardized coefficient (β) | p                |
|----------------------------------|------------|-----------------------------------|--------------------------|------------------------------|------------------|
| Early Group Latent Intercept     | Depression | 0.039                             | -0.089, 0.167            | 0.09                         | 0.546            |
|                                  | Negative   | -0.053                            | -0.128, 0.023            | -0.10                        | 0.173            |
|                                  | Psychosis  | -0.034                            | -0.115, 0.047            | -0.10                        | 0.416            |
| Early Group Latent Change        | Depression | 0.085                             | 0.035, 0.135             | <b>0.28</b>                  | <b>0.001</b>     |
|                                  | Negative   | 0.086                             | 0.043, 0.129             | <b>0.25</b>                  | <b>&lt;0.001</b> |
|                                  | Psychosis  | 0.201                             | 0.166, 0.236             | <b>0.50</b>                  | <b>&lt;0.001</b> |
| Late Group Latent Intercept      | Depression | 0.003                             | -0.049, 0.055            | 0.01                         | 0.912            |
|                                  | Negative   | 0.039                             | -0.008, 0.085            | 0.10                         | 0.106            |
|                                  | Psychosis  | 0.059                             | 0.012, 0.106             | <b>0.14</b>                  | <b>0.012</b>     |
| Late Group Latent Change         | Depression | 0.033                             | 0.005, 0.060             | <b>0.24</b>                  | <b>0.019</b>     |
|                                  | Negative   | 0.005                             | -0.014, 0.024            | 0.02                         | 0.615            |
|                                  | Psychosis  | 0.026                             | -0.002, 0.055            | 0.10                         | 0.069            |

**Table S5c. Parallel growth process model of hostility (H), psychosis (P) and excitement/mania (M) in the NEDEN data adjusted for centre, sex, age, ethnicity, education, living alone, and drug use.**

| SEM Group & latent variable type | Symptoms   | Log <sub>10</sub> DUP coefficient | 95% Confidence Intervals | Standardized coefficient (β) | p                |
|----------------------------------|------------|-----------------------------------|--------------------------|------------------------------|------------------|
| Early Group Latent Intercept     | Hostility  | -0.061                            | -0.108, -0.015           | <b>-0.15</b>                 | <b>0.010</b>     |
|                                  | Excitement | -0.199                            | -0.278, -0.120           | <b>-0.40</b>                 | <b>&lt;0.001</b> |
|                                  | Psychosis  | -0.004                            | -0.083, 0.074            | -0.01                        | 0.912            |
| Early Group Latent Change        | Hostility  | 0.151                             | 0.105, 0.197             | <b>0.40</b>                  | <b>&lt;0.001</b> |
|                                  | Excitement | 0.229                             | 0.111, 0.347             | <b>0.46</b>                  | <b>&lt;0.001</b> |
|                                  | Psychosis  | 0.187                             | 0.136, 0.238             | <b>0.46</b>                  | <b>&lt;0.001</b> |
| Late Group Latent Intercept      | Hostility  | 0.027                             | 0.012, 0.042             | <b>0.11</b>                  | <b>0.001</b>     |
|                                  | Excitement | -0.010                            | -0.048, 0.029            | -0.04                        | 0.624            |
|                                  | Psychosis  | 0.044                             | -0.018, 0.106            | 0.11                         | 0.166            |
| Late Group Latent Change         | Hostility  | -0.022                            | -0.056, 0.011            | -0.19                        | 0.184            |
|                                  | Excitement | -0.006                            | -0.039, 0.027            | -0.04                        | 0.730            |
|                                  | Psychosis  | 0.028                             | -0.010, 0.065            | 0.10                         | 0.147            |

**Table S6a. Predictors of baseline SOFAS score in NEDEN, adjusted for centre (predictors p<0.20)**

| Early Phase (adjusted R <sup>2</sup> 20%) |                |                 |                |                  | Late Phase (adjusted R <sup>2</sup> 38%) |                |                 |                |                  |
|-------------------------------------------|----------------|-----------------|----------------|------------------|------------------------------------------|----------------|-----------------|----------------|------------------|
| Predictor                                 | b <sup>a</sup> | CI <sup>b</sup> | β <sup>c</sup> | p                | Predictor                                | b <sup>a</sup> | CI <sup>b</sup> | β <sup>c</sup> | p                |
| Negative                                  | -3.2           | -5.9, -0.9      | <b>-0.21</b>   | <b>0.008</b>     | Negative                                 | -5.7           | -7.0, -4.4      | <b>-0.35</b>   | <b>&lt;0.001</b> |
| Depression                                | -1.9           | -3.8, -0.1      | <b>-0.15</b>   | <b>0.041</b>     | Depression                               | -2.0           | -3.3, -0.7      | <b>-0.10</b>   | <b>0.002</b>     |
| Poor insight                              | -3.2           | -4.7, -1.6      | <b>-0.29</b>   | <b>&lt;0.001</b> | Poor insight                             | -1.2           | -2.1, -0.2      | <b>-0.14</b>   | <b>0.013</b>     |
|                                           |                |                 |                |                  | Psychosis                                | -4.1           | -5.4, -2.7      | <b>-0.28</b>   | <b>&lt;0.001</b> |
|                                           |                |                 |                |                  | Hostility                                | -2.0           | -3.9, -0.2      | <b>-0.07</b>   | <b>0.031</b>     |
|                                           |                |                 |                |                  | Age, years                               | -0.3           | -0.5, -0.0      | <b>-0.08</b>   | <b>0.024</b>     |

- a. Unstandardized coefficient  
b. 95% confidence intervals  
c. Standardised coefficient

**Table S6b. Predictors of final SOFAS score in NEDEN, adjusted for centre (adjusted R2 56%; predictors p<0.20)**

| Predictor      | b <sup>a</sup> | 95% Confidence Intervals | β <sup>b</sup> | p                |
|----------------|----------------|--------------------------|----------------|------------------|
| Baseline SOFAS | 0.23           | 0.17, 0.29               | <b>0.20</b>    | <b>&lt;0.001</b> |
| Negative       | -7.23          | -8.78, -5.69             | <b>-0.31</b>   | <b>&lt;0.001</b> |
| Depression     | -4.47          | -5.63, -3.32             | <b>-0.26</b>   | <b>&lt;0.001</b> |
| Poor insight   | -1.78          | -2.81, -0.76             | <b>-0.11</b>   | <b>0.001</b>     |
| Psychosis      | -2.90          | -4.33, -1.48             | <b>-0.15</b>   | <b>&lt;0.001</b> |
| Hostility      | -2.73          | -4.62, 0.84              | <b>-0.09</b>   | <b>0.005</b>     |
| Female         | 1.91           | -0.29, 4.05              | 0.05           | 0.079            |
| Lived alone    | -2.68          | -5.43, 0.07              | -0.05          | 0.056            |
| Had A-levels   | 2.89           | 0.87, 4.91               | <b>0.08</b>    | <b>0.005</b>     |

- a. Unstandardized coefficient  
b. Standardised coefficient

**Table S6c. Predictors of baseline SOFAS in Outlook, adjusted for EIS (predictors p<0.20)**

| Early Phase (adjusted R <sup>2</sup> 42%) |                |                 |                |              | Late Phase (adjusted R <sup>2</sup> 25%) |                |                 |                |              |
|-------------------------------------------|----------------|-----------------|----------------|--------------|------------------------------------------|----------------|-----------------|----------------|--------------|
| Predictor                                 | b <sup>a</sup> | CI <sup>b</sup> | β <sup>c</sup> | p            | Predictor                                | b <sup>a</sup> | CI <sup>b</sup> | β <sup>c</sup> | p            |
| Negative                                  | -6.6           | -14.6, 1.5      | -0.30          | 0.092        | Negative                                 | -3.5           | -8.1, -1.1      | -0.21          | 0.108        |
| Hostility                                 | -7.0           | -10.4, -3.7     | <b>-0.34</b>   | <b>0.003</b> | Psychosis                                | -4.5           | -7.2, -1.7      | <b>-0.27</b>   | <b>0.008</b> |
| Age, years                                | 0.40           | 0.69, 0.11      | <b>0.26</b>    | <b>0.017</b> | Drug use                                 | -3.8           | -8.5, +1.0      | -0.10          | 0.095        |

- a. Unstandardized coefficient  
b. 95% confidence intervals  
c. Standardised coefficient

**Table S6d. Predictors of final SOFAS in Outlook, adjusted for EIS (adjusted R2 54%; predictors p<0.20)**

| Predictor      | b <sup>a</sup> | 95% Confidence Intervals | β <sup>b</sup> | p            |
|----------------|----------------|--------------------------|----------------|--------------|
| Baseline SOFAS | 0.30           | 0.03, 0.58               | <b>0.28</b>    | <b>0.037</b> |
| Negative       | -5.53          | -9.69, -1.37             | <b>-0.23</b>   | <b>0.019</b> |
| Depression     | -3.91          | -5.20, -2.63             | <b>-0.24</b>   | <b>0.001</b> |
| Psychosis      | -5.35          | -8.89, -1.80             | <b>-0.28</b>   | <b>0.012</b> |
| Age, years     | -0.25          | -0.41, -0.08             | <b>-0.12</b>   | <b>0.012</b> |
| Had A-levels   | 1.98           | 0.78, 3.18               | <b>0.12</b>    | <b>0.008</b> |

- a. Unstandardized coefficient  
b. Standardised coefficient

## References

1. Larsen TK, McGlashan TH, Moe LC. First-episode schizophrenia: I. Early course parameters. *Schizophr Bull.* 1996; 22:241-256
2. Gater R, de Almeida e Sousa B, Barrientos G, Caraveo J, Chandrashekar CR, Dhadphale M, Goldberg G, Al Kathiri AH, Mubbashar M, Silhan K, Thong D, Torres-Gonzales F, Sartorius N. The pathways to psychiatric care: a cross-cultural study. *Psychol Med* 1991; 21: 761–74.
3. Joint Formulary Committee. *British National Formulary 64* BMJ Group and Pharmaceutical Press; 2012.
4. *Stata 14.1.* StataCorp LP, 4905 Lakeway Dr, College Station, Texas 77845, USA; 2015
5. Berry A, Marshall M, Birchwood M, Lewis S, Huda S, Yung A, Drake R. Factor analyses of successive assessments by multiple scales have a consistent structure in a cohort of first episode psychoses. *Schizophr Bull.* 2018; 44(Suppl. 1): S156
6. Kline RB *Principles and practice of structural equation modelling, 4<sup>th</sup> edition.* The Guilford Press: New York, USA; 2016
7. Skrondal A, Rabe-Hesketh S. *Generalized Latent Variable Modeling: Multilevel, Longitudinal, and Structural Equation Models.* Chapman & Hall/CRC: Boca Raton, USA; 2004
8. Verbeke G, Molenberghs G, Beunckens C. Formal and informal model selection with incomplete data. *Statistical Science.* 2008; 23(2): 201-18
9. Kaplan D. *Structural equation modelling: Foundations and Extensions. 2<sup>nd</sup> Ed.* Sage: Thousand Oaks, USA; 2009
10. Drake RJ, Haley CJ, Dunn G, Tarrier N, Haddock G, Lewis SW. The evolution of symptoms during the early course of non-affective psychosis. *Schizophr Res.* 2003; 63(1-2): 171-6
